# Supplementary material for: Exploring engagement with a web-based dietary intervention for adults with type 2 diabetes: A mixed methods evaluation of the T2Diet study
Source: PLOS journal article supplement (doi:10.1371/journal.pone.0279466), 2022-12-30
Supplement: S4 (10.1371/journal.pone.0279466.s004) [file journal.pone.0279466.s004]

### S3 Appendix: *A Priori* Coding Tree

|                                                         |                                                                                                                   |
|---------------------------------------------------------|-------------------------------------------------------------------------------------------------------------------|
| <b>Behavioral</b>                                       | Reactions or actions made in response to program stimuli, with an interest to learn more about offline engagement |
| <b>Affective</b>                                        | Relating to feelings, attitudes and moods (positive or negative)                                                  |
| <b>Cognitive</b>                                        | Process of acquiring knowledge and understanding, making decisions and producing responses                        |
| <b>Intervention features, content, mode of delivery</b> | Exploring intervention features: eg, what is it about 'X' that was so appealing?<br>Impacted intentions, etc?     |
| <b>Behavior changes</b>                                 | Most common behavior changes/ patterns for participants                                                           |

#### **Exploring engagement with a web-based dietary intervention for adults with type 2 diabetes: a mixed methods evaluation of the T2Diet study**

Jedha Dening<sup>1</sup>, Karly Zacharia<sup>2</sup>, Kylie Ball<sup>1#</sup>, Elena S George<sup>1#</sup>, Sheikh Mohammed Shariful Islam<sup>1#</sup>

<sup>1</sup> Institute for Physical Activity and Nutrition, School of Exercise and Nutrition Sciences, Deakin University, Locked Bag 20000, Geelong, Victoria, 3220, Australia

<sup>2</sup> Faculty of Health & Medicine, School of Health Sciences, University of Newcastle, Callaghan, NSW 2305, Australia

#equal contribution
